# Supplementary material for: Nitrosyl and carbene iron complexes bearing a κ3-SNS thioamide pincer type ligand
Source: Royal Society of Chemistry journal article supplement (doi:10.1039/c4dt03128h), 2014-11-03
Supplement: c4dt03128h1.pdf [file c4dt03128h1.pdf]

## Nitrosyl and carbene iron complexes bearing $\kappa^3$ -SNS thioamide pincer type ligand

Tatsuya Suzuki<sup>a</sup>, Jun Matsumoto<sup>a</sup>, Yuji Kajita<sup>b</sup>, Tomohiko Inomata<sup>a</sup>, Tomohiro Ozawa<sup>a</sup>, and Hideki Masuda<sup>\*a</sup>

<sup>a</sup>Department of Frontier Materials, Graduate School of Engineering, Nagoya Institute of Technology, Gokiso, Showa, Nagoya 466-8555, Japan

<sup>b</sup>Department of Applied Chemistry, Aichi Institute of Technology, 1247 Yachigusa, Yakusa-cho, Toyota 470-0392, Japan

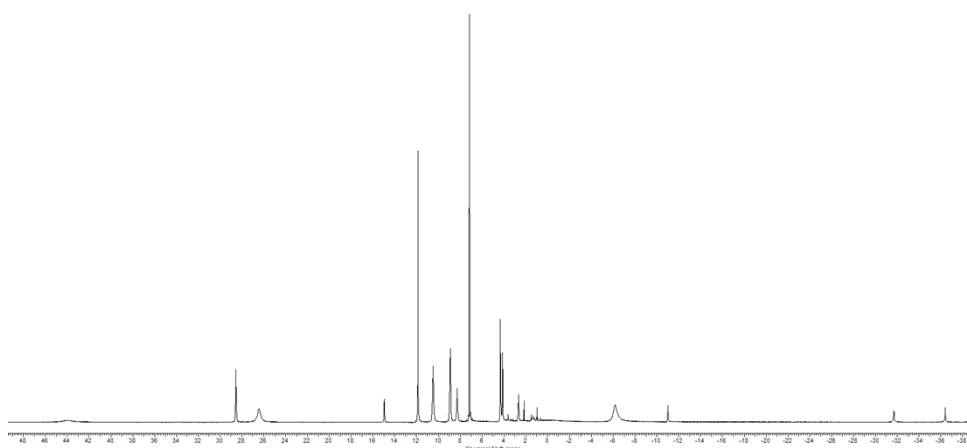

**Fig. S1** <sup>1</sup>H-NMR spectrum of [Fe(NHC)( $\kappa^3$ -L<sup>DPM</sup>)] in C<sub>6</sub>D<sub>6</sub>.

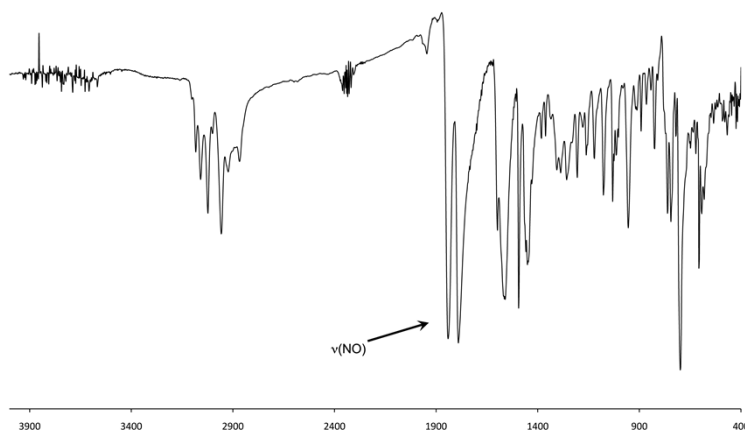

**Fig. S2** IR spectrum of [Fe(NO)<sub>2</sub>( $\kappa^3$ -L<sup>DPM</sup>)].

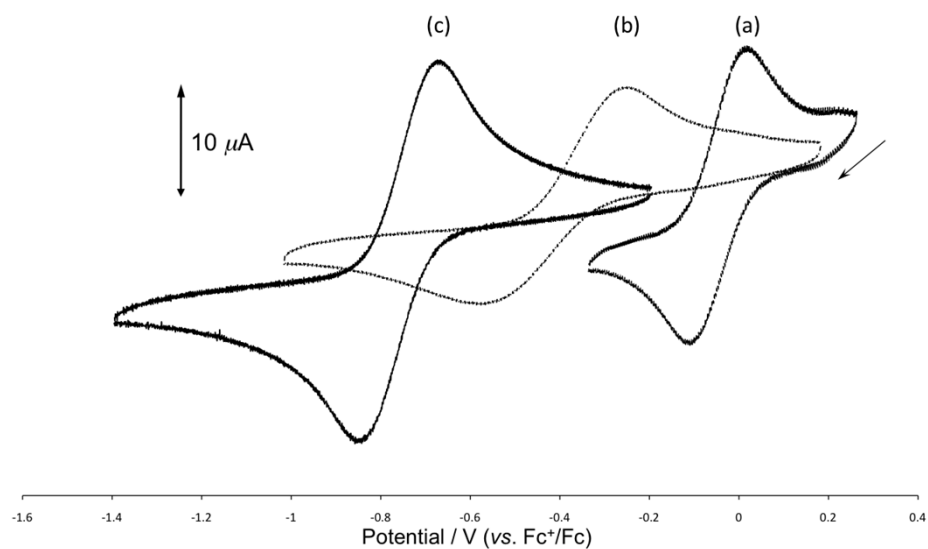

**Fig. S3** Cyclic voltammogram of  $[\text{Fe}(\text{THF})_2(\kappa^3\text{-LDPM})]$  (1 mM); (a),  $[\text{Fe}(\text{NHC})(\kappa^3\text{-LDPM})]$  (1 mM); (b) and  $[\text{Fe}(\text{NO})_2(\kappa^3\text{-LDPM})]$  (1 mM); (c) in THF under Ar at sweep rate of  $100 \text{ mV s}^{-1}$ .

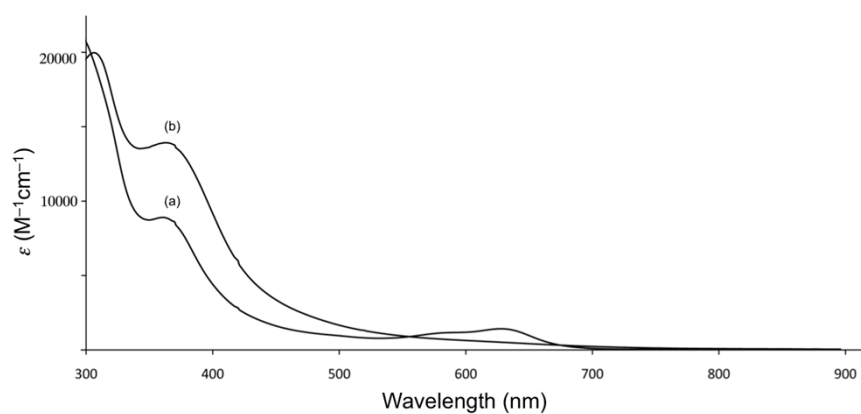

**Fig. S4** UV/vis spectra of  $[\text{Fe}(\text{NHC})(\kappa^3\text{-LDPM})]$  (a) and  $[\text{Fe}(\text{NO})_2(\kappa^3\text{-LDPM})]$  (b) as 0.1 mM in THF.

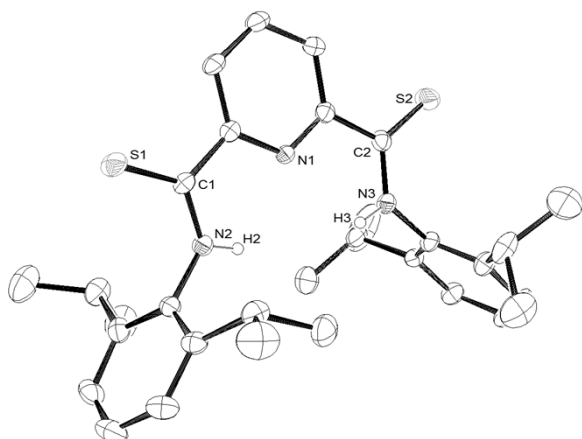

**Fig. S5** ORTEP drawing of  $\mathbf{H}_2\mathbf{L}^{\text{DIP}}$  ligand with ellipsoids at 30% probability level. The hydrogen atoms and aromatic substituents on N–thioamide group are omitted for clarity except for H(2) and H(3) atoms. Selected bond lengths (Å): C(1)–N(2) 1.337(5), C(2)–N(3) 1.340(5), C(1)–S(1) 1.649(4), C(2)–S(2) 1.642(4).

Table S1. Crystallographic and structure refinement data for compounds  $\mathbf{H}_2\mathbf{L}^{\text{DIP}}$ ,  $[\text{Fe}(\kappa^3\text{-H}_2\mathbf{L}^{\text{DIP}})_2](2\cdot\text{Br})$ ,  $[\text{Fe}(\text{NHC})(\kappa^3\text{-L}^{\text{DPM}})]$ , and  $[\text{Fe}(\text{NO})_2(\kappa^3\text{-L}^{\text{DPM}})]$ .

| Compound                                  | $\mathbf{H}_2\mathbf{L}^{\text{DIP}}$                                | $[\text{Fe}(\kappa^3\text{-H}_2\mathbf{L}^{\text{DIP}})_2](2\cdot\text{Br})$                              | $[\text{Fe}(\text{NHC})(\kappa^3\text{-L}^{\text{DPM}})]$                                                        | $[\text{Fe}(\text{NO})_2(\kappa^3\text{-L}^{\text{DPM}})]$                                |
|-------------------------------------------|----------------------------------------------------------------------|-----------------------------------------------------------------------------------------------------------|------------------------------------------------------------------------------------------------------------------|-------------------------------------------------------------------------------------------|
| Chemical formula                          | $\text{C}_{31}\text{H}_{39}\text{N}_3\text{S}_2 \cdot \text{CHCl}_3$ | $\text{C}_{62}\text{H}_{78}\text{FeN}_6\text{S}_4 \cdot 2\text{Br} \cdot 3(\text{C}_2\text{H}_6\text{O})$ | $\text{C}_{104}\text{H}_{101}\text{FeN}_5\text{S}_2 \cdot 2(\text{C}_6\text{H}_6) \cdot \text{C}_5\text{H}_{12}$ | $\text{C}_{77}\text{H}_{65}\text{FeN}_5\text{O}_2\text{S}_2 \cdot \text{CH}_2\text{Cl}_2$ |
| Formula weight                            | 637.17                                                               | 1389.44                                                                                                   | 1771.33                                                                                                          | 1297.29                                                                                   |
| Temp (°C)                                 | –100                                                                 | –100                                                                                                      | –120                                                                                                             | –100                                                                                      |
| Crystal system                            | Monoclinic                                                           | Triclinic                                                                                                 | Monoclinic                                                                                                       | Triclinic                                                                                 |
| Space group                               | $P2_1/n$ (#14)                                                       | $P-1$ (#2)                                                                                                | $P2_1/n$ (#13)                                                                                                   | $P-1$ (#2)                                                                                |
| $a / \text{Å}$                            | 12.089(3)                                                            | 12.572(2)                                                                                                 | 19.615(3)                                                                                                        | 8.53160(10)                                                                               |
| $b / \text{Å}$                            | 15.277(3)                                                            | 15.106(3)                                                                                                 | 22.908(3)                                                                                                        | 17.3689                                                                                   |
| $c / \text{Å}$                            | 18.575(4)                                                            | 18.852(3)                                                                                                 | 20.265(3)                                                                                                        | 23.9404(2)                                                                                |
| $\alpha / ^\circ$                         |                                                                      | 87.160(4)                                                                                                 |                                                                                                                  | 73.322(4)                                                                                 |
| $\beta / ^\circ$                          | 97.530(3)                                                            | 84.309(4)                                                                                                 | 108.4184(12)                                                                                                     | 84.257(4)                                                                                 |
| $\gamma / ^\circ$                         |                                                                      | 87.522(4)                                                                                                 |                                                                                                                  | 79.592(4)                                                                                 |
| $V / \text{Å}^3$                          | 3400.9(11)                                                           | 3805(2)                                                                                                   | 8639(2)                                                                                                          | 3338.07(8)                                                                                |
| $Z$                                       | 4                                                                    | 2                                                                                                         | 2                                                                                                                | 2                                                                                         |
| $D_{\text{calc}} / \text{g cm}^{-3}$      | 1.244                                                                | 1.298                                                                                                     | 1.142                                                                                                            | 1.291                                                                                     |
| $\mu(\text{Mo-K}\alpha) / \text{cm}^{-1}$ | 4.171                                                                | 15.036                                                                                                    | 2.375                                                                                                            | 4.197                                                                                     |
| $F(000)$                                  | 1344                                                                 | 1460                                                                                                      | 1892                                                                                                             | 1356                                                                                      |
| Reflections collected                     | 26859                                                                | 28056                                                                                                     | 40001                                                                                                            | 26248                                                                                     |
| Independent reflections                   | 7774                                                                 | 15634                                                                                                     | 11790                                                                                                            | 14602                                                                                     |
| $R(\text{int})$                           | 0.0721                                                               | 0.0500                                                                                                    | 0.0359                                                                                                           | 0.0228                                                                                    |
| $RI (I > 2\sigma(I))^a$                   | 0.0846                                                               | 0.0568                                                                                                    | 0.0552                                                                                                           | 0.0520                                                                                    |
| $RI$ (all)                                | 0.1507                                                               | 0.0768                                                                                                    | 0.0667                                                                                                           | 0.0704                                                                                    |
| $wR2$ (all)                               | 0.1941                                                               | 0.1459                                                                                                    | 0.1556                                                                                                           | 0.1453                                                                                    |
| GOF                                       | 1.074                                                                | 1.035                                                                                                     | 1.079                                                                                                            | 1.052                                                                                     |
| CCDC number                               | 1028474                                                              | 1028475                                                                                                   | 1028476                                                                                                          | 1028477                                                                                   |

$$^a R = \sum \|F_o\| - \|F_c\| / \sum \|F_o\|, wR2 = [\sum (w(F_o^2 - F_c^2)^2) / \sum w(F_o^2)^2]^{1/2}$$
